# Supplementary material for: Electrospun 1D-NiO hollow nanowires on glass support for the sunlight-driven photodegradation of methylene blue
Source: Royal Society of Chemistry journal article supplement (doi:10.1039/d2ra04826d), 2022-01-01
Supplement: d2ra04826d1.pdf [file d2ra04826d1.pdf]

## **Supporting Information:**

### **Electrospun 1D-NiO hollow nanowires on glass support for sunlight driven photodegradation of methylene blue**

K. Chandra Sekhar Reddy <sup>a,1\*</sup>, B. Naveen Kumar Reddy <sup>b,1</sup>, Víctor Hugo Martínez-Landeros <sup>c</sup>,  
R Ramírez-Bon <sup>a\*</sup>

<sup>a</sup> Centro de Investigación y de Estudios Avanzados del IPN, Unidad Querétaro, Apdo, Postal 1-798,  
76001 Querétaro, México

<sup>b</sup> Instituto de Físicas, Universidad Nacional Autónoma de México, Ciudad de México, C.P. 04510,  
México.

<sup>c</sup> Universidad Autónoma de Coahuila Carretera 57, Monclova Coah. C.P. 25720, México.

\*Corresponding authors E-mail: [chandra.kolli@cinvestav.mx](mailto:chandra.kolli@cinvestav.mx), [rrbon@cinvestav.mx](mailto:rrbon@cinvestav.mx).

<sup>1</sup> Authors with equal contribution

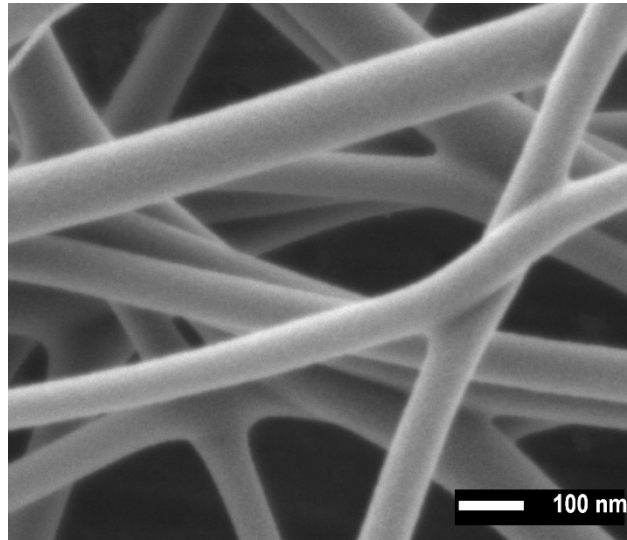

**Fig. S1:** FESEM image of as electrospun PVA/Ni (NO<sub>3</sub>)<sub>2</sub> nanofibers composite.

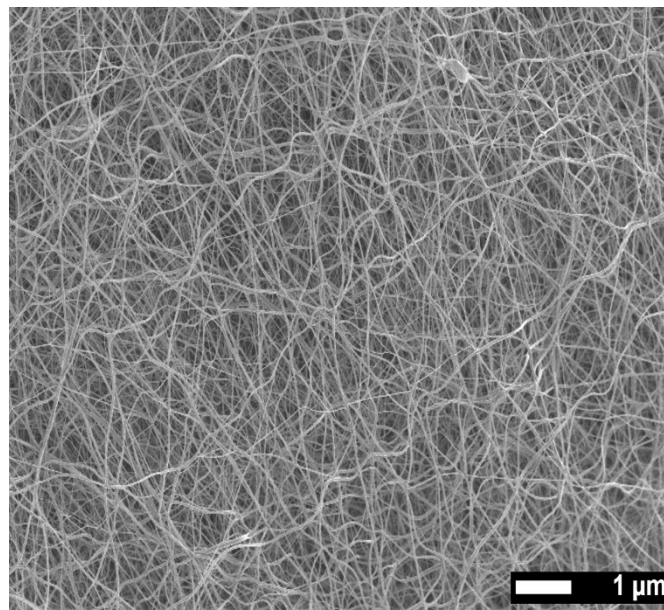

**Fig. S2:** Large area FESEM image of NiO NWs after calcination at 450 °C.

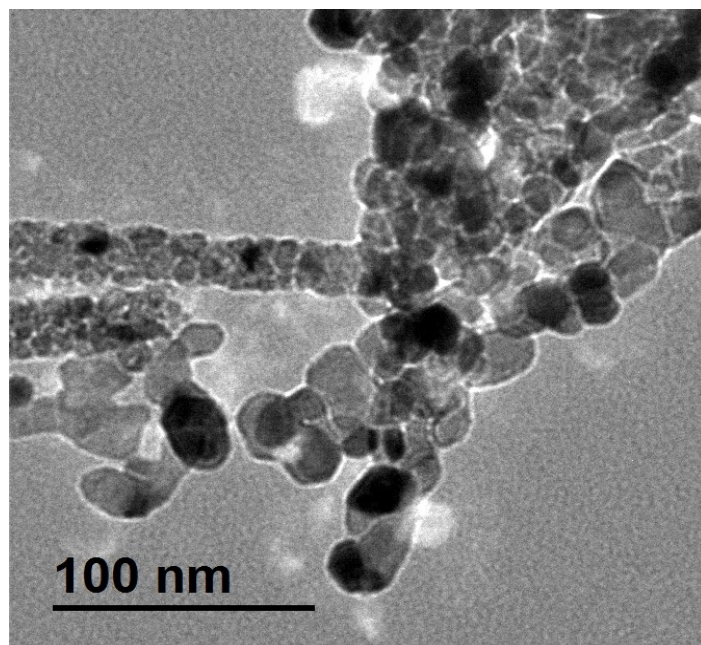

**Fig. S3:** TEM image of NiO NWs at higher magnification.

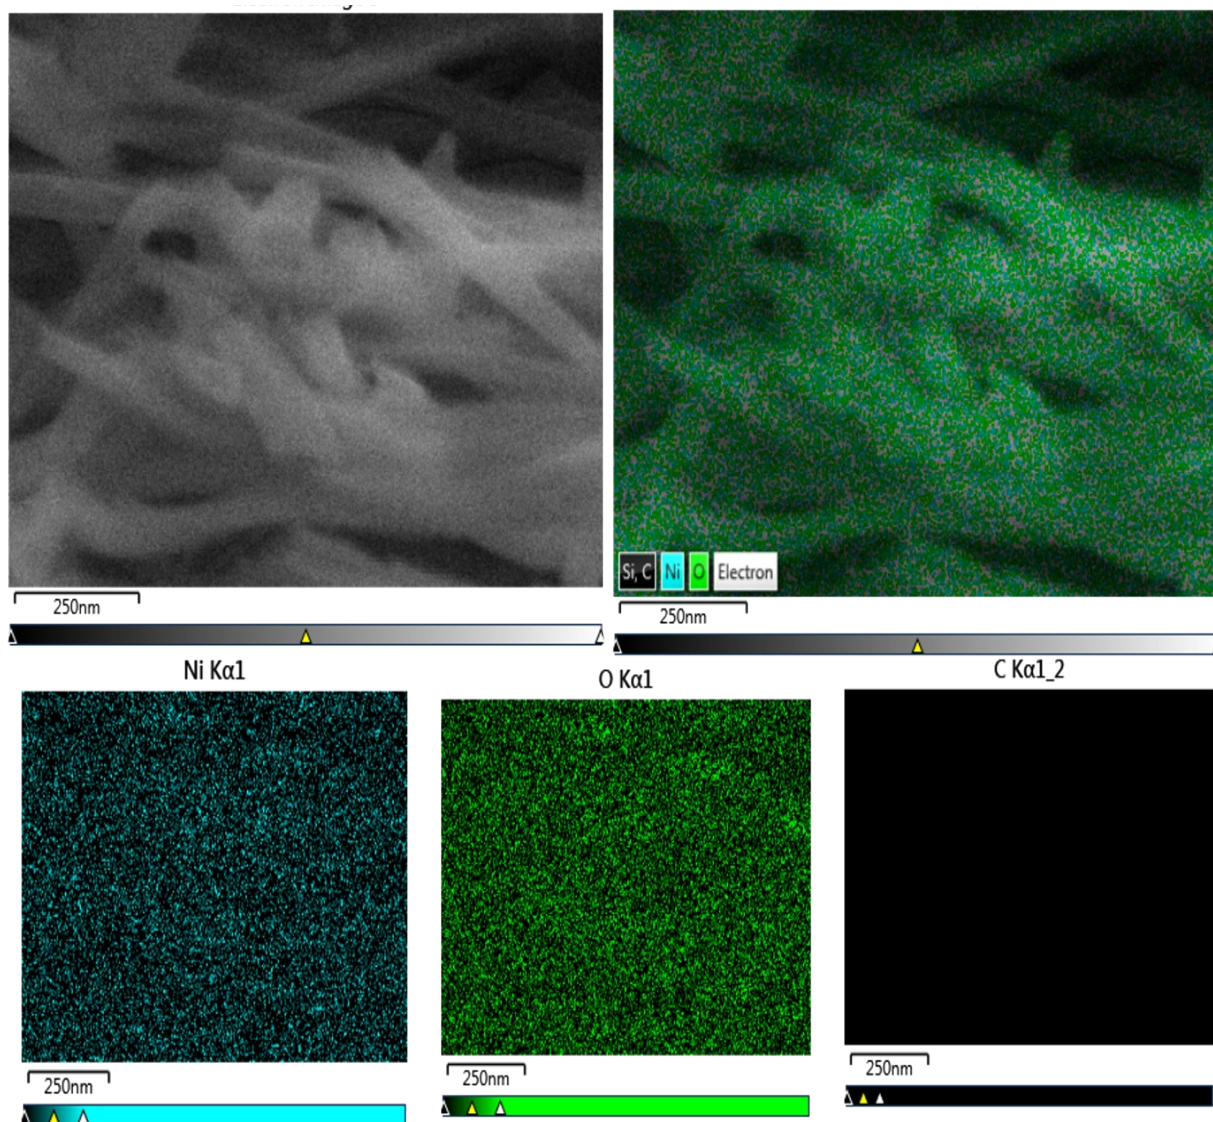

Fig. S4: Energy dispersive X-ray spectroscopy (EDS) elemental mapping of NiO NWs.

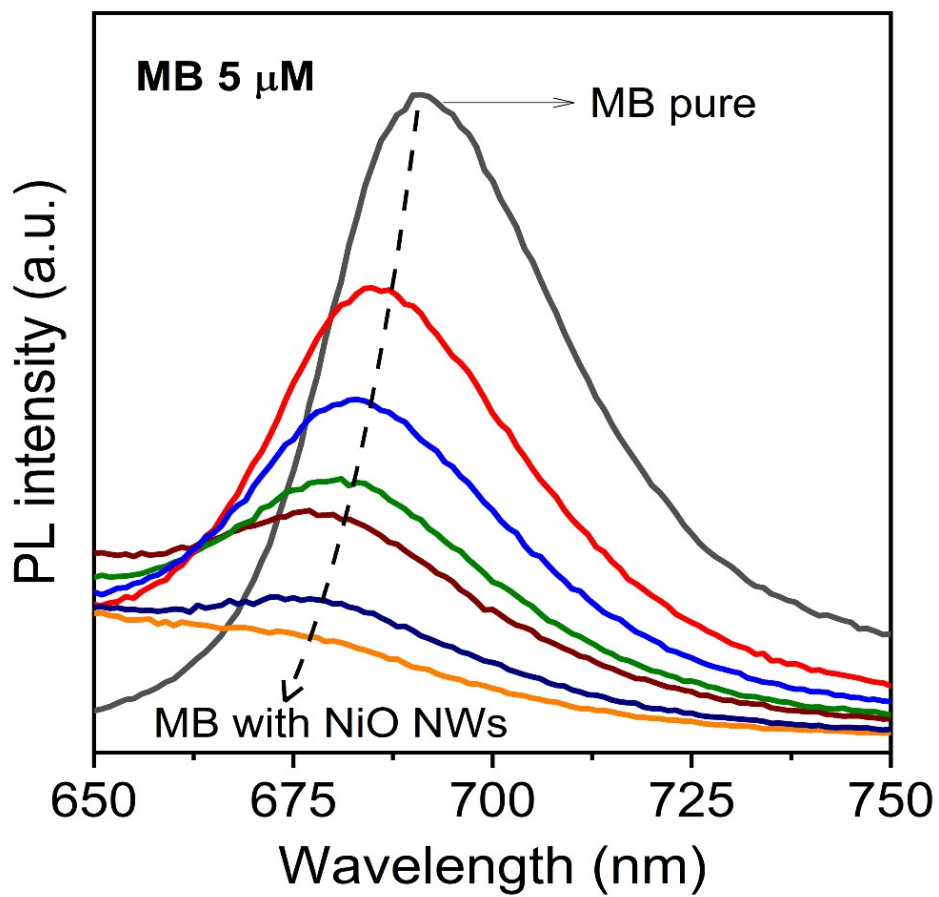

**Fig. S5:** PL spectra of emission wavelengths in the MB concentration 5  $\mu\text{M}$  in time interval analysis.

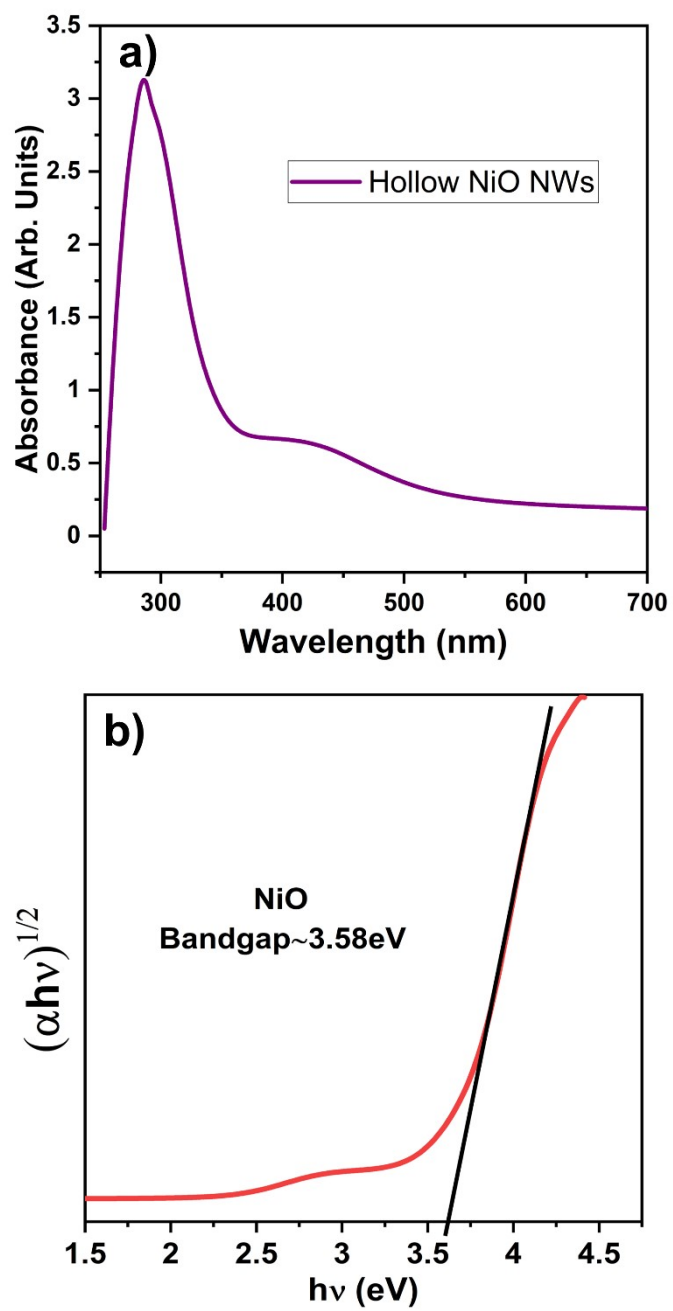

Fig. S6: (a) UV-VIS absorbance spectrum of NiO NWs; (b) Bandgap calculation by Tauc plot of NiO NWs.

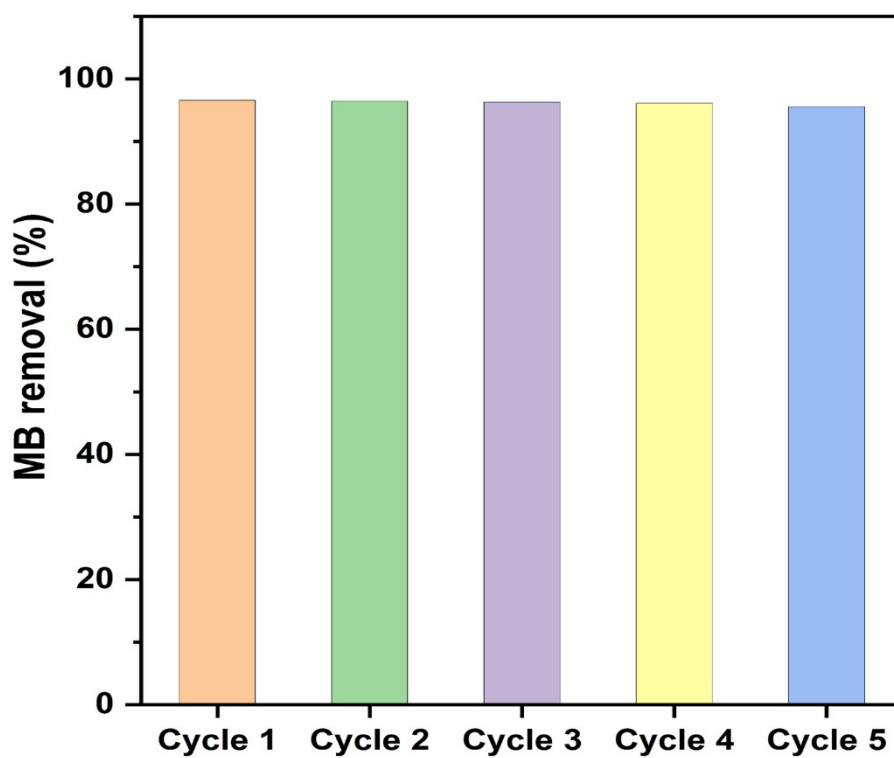

Fig. S7: The results suggest that the hollow NiO NWs catalyst is stable and may be reused for a minimum of five cycles without appreciable performance degradation.
